# Supplementary material for: Size characterization of Plasmonic Nanoparticles with Dark-Field Single Particle Spectrophotometry
Source: Research Square preprint supplement (doi:10.21203/rs.3.rs-1835449/v1), 2022-07-20
Supplement: Supplementary file 1 [file a08b759f97c37f538b88e895.docx]

**Supplementary information**

**Size characterization of Plasmonic Nanoparticles with Dark-Field Single Particle Spectrophotometry**

**Rodrigo Calvo1,2, Andreas Thon1, Asis Saad1, Antonio Salvador-Matar1, Miguel Manso2, Óscar Ahumada1, Valerio Pini1,***

1MecWins, Roda de Poniente 15, Tres Cantos, 28760, Madrid, Spain

2Departamento de Física Aplicada, Universidad Autónoma de Madrid, Campus de Cantoblanco, 28049, Madrid, Spain

*[vpini@mecwins.com](mailto:vpini@mecwins.com)

1. **Monomers Detection from image analysis**

In each image taken with the DF-SPS there are multiple nanoparticles, and in many cases the GNPs form agglomerations, such as dimers, trimers, or larger clusters. As nanoparticle agglomerations present very complex spectra which are difficult to model theoretically, they have been discarded in the following analysis. Before performing the spectral analysis of the sample, a color image of the sample is taken; the captured color image allows a rapid identification and classification of the monomers and their positions within the sample according to the procedure described below.

The particle recognition software first identifies potential particles based on their shape and size. A gray-scale test pattern is generated which represents the typical shape of a nanoparticle in an image from the camera, considering the actual image acquisition parameters used. Here, the shape of a nanoparticle is represented by a radially symmetric two-dimensional Gaussian function. The normalized two-dimensional cross-correlation between the grayscale image and the test pattern is calculated. This image has values close to "1" for regions that are similar in shape to the test pattern. Local maxima, *i.e.*, pixels with values higher than those of all their direct neighbors, are located and the positions are considered as potential positions of the particles. Once detected, the position and average brightness of each particle is stored, as well as the values of the three RGB channels.

The discrimination of particles is based on the amount of scattering and on the normalized values of one color component; in the example, the red component is used. Both values form the axes of a 2-dimensional histogram in which the particle types are identified: noise, dust, monomers (individual GNPs), dimers, trimers, clusters etc. (Figure S1).


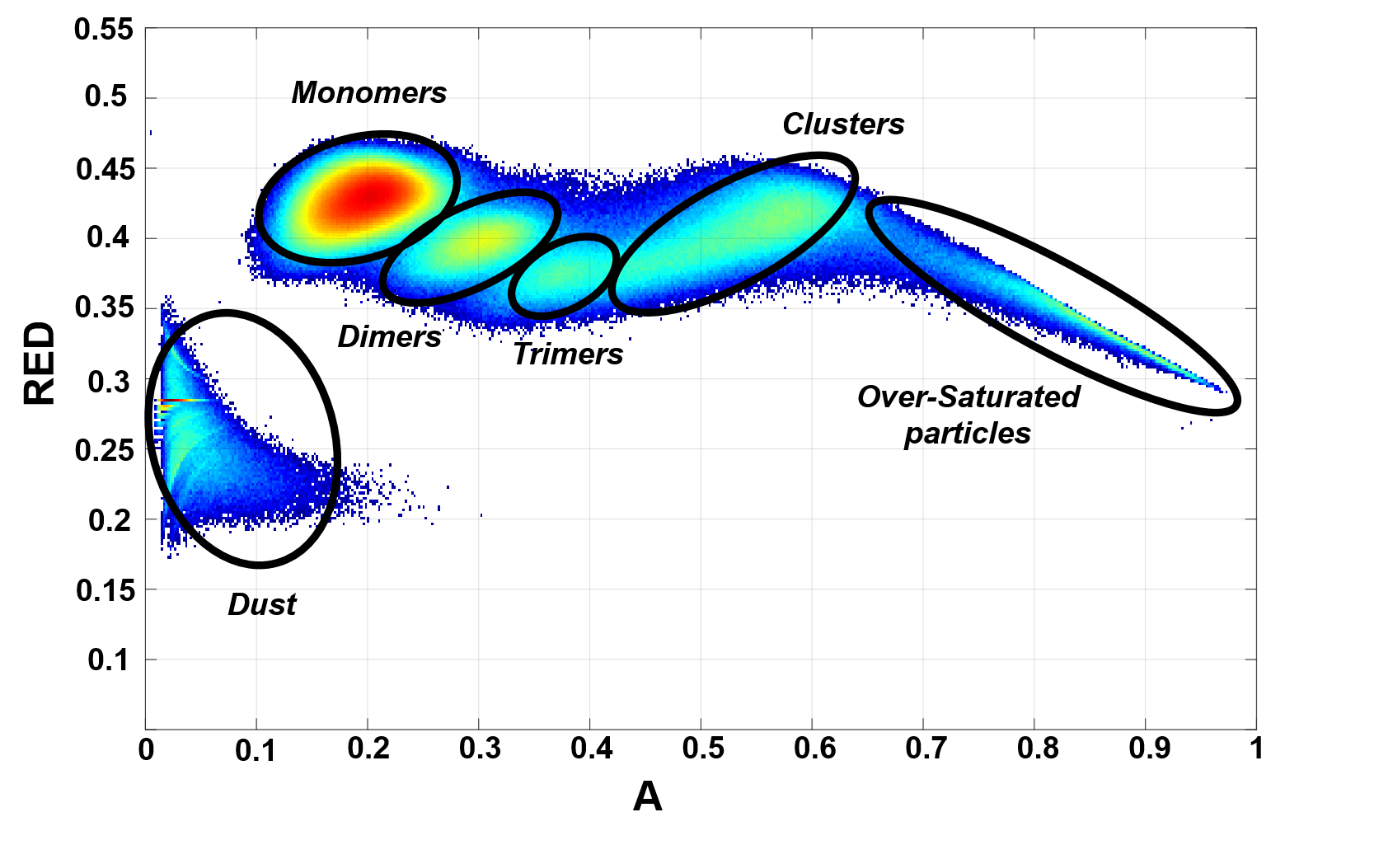


**Figure S1**: Color-coded 2D histogram of the brightness and the red channel of 100 nm detected particles (reddish colors indicate higher counts, bluish colors lower counts); both brightness and red channels have been normalized to the maximum allowable value. Each type of particles can be easily identified and distinguished in 2D histogram.

Once the particles are classified, the number of particles in each class is counted, and the location of each particle in the image is stored. After this identification and classification procedure, each monomer present on the surface can be identified in the image with a pair a XY coordinates.

1. **Data processing**

During the spectral measurement of the sample surface, a tridimensional dataset commonly known as spectral cube is generated. The spectral cube is obtained by stacking the scattering signal of the entire field of view at different spectral wavelengths; so, in this way, the first two dimensions of the spectral cube represent the sample surface, while the third one corresponds to the wavelength. In a standard spectral measurement, the complete 3D dataset is composed of 101 spectral images (from 450 nm to 650 nm with steps of 2 nm). Each spectral image is a monochromatic picture of 5 MP with a bit depth of 88, i.e., the brightness scale per pixel then runs from 0 to 255. As the monochromatic images are saved during the measurement in TIFF format, before the creation of the spectral cube the images are converted to a linear brightness representation, by eliminating the non-linear compression coming from the gamma encoding algorithm.1

In order to eliminate any variations coming from pixel-to-pixel sensitivity of the detector and by distortions in the optical detection and illumination path, each monochromatic image is also flat-field corrected pixel-by-pixel using the following equation:

|  | (1) |
| --- | --- |

where is the corrected image, is the raw image, is the dark frame, and is the flat frame, while m is a constant defined as the averaged value of the difference image . For the flat frame, a diffuse reflectance standard has been used (*SRS-99-010 from Labsphere*).

1. **Data analysis**

Once the 3D dataset has been linearized and flat-field corrected, scattering spectra of each individual monomers are calculated. According to the previous classification described in S3, all the XY coordinates of each individual monomer are well known, and the scattering size of each monomer is defined by the optical resolution of the objective and the spatial resolution of the detector used (in the current setup each particle is defined by a circular area of 25 pixels).

Scattering spectra of each monomer are calculated by integrating the wavelength-dependent scattering in a circular region around each XY monomer’s coordinate. To each of these spectra, a Lorentzian fitting is adjusted:

|  | (2) |
| --- | --- |

where S(λ) is the wavelength-dependent scattering signal of the particle, the curve amplitude, w is the peak’s width, and the wavelength of the plasmon resonance peak.

After the fitting procedure, a filtering process based on the coefficient R-squared (R2 > 0.9) is performed; this filtering process allows discarding the few unwanted particles that may have been erroneously identified and classified as monomers.

1. **Mie theory**

Mie theory describes the scattering cross section2,3 of a spherical particle of radius *r* inside a medium with a dielectric function at a given wavelength:

|  | (3) |
| --- | --- |

and are the scattering coefficients in terms of the Ricatti-Bessel spherical functions

and

|  | (4) |
| --- | --- |
|  | (5) |

Here, is the size parameter defined as the ratio between the nanoparticle’s characteristic dimension and the light wavelength and is the ratio between the refractive index of the particle and the surrounding medium . In this experiment, the surrounding medium is glycerol so . For the numerical calculation of the scattering signal, Mie functions based on Mätzler’s (2022) code4 have been used.

Optical properties of particles with a size comparable to the mean free path of conduction electrons () present significant variations compared to the optical properties of bulk materials. According to the extended Drude model5, the collision of free electrons with the surface become even more important for smaller nanoparticle sizes; due to this, also the collision frequency results size-dependent:

|  | (6) |
| --- | --- |

where is the collision frequency for bulk material and is the Fermi velocity; for gold and .

The dielectric constant in metals can now be written in this way:

|  | (7) |
| --- | --- |

where and consist of an additive contribution from free electrons

|  | (8) |
| --- | --- |
|  | (9) |

While and are two terms related to the bound electrons that can be calculated by using the optical properties of bulk material; for the calculation of the spectral response of gold nanoparticles, optical properties from Johnson and Christy database have been used6. is the plasma frequency for gold.

The refractive index and the extinction coefficient of the GNPs can now be calculated by using the following equation:

|  | (10) |
| --- | --- |

By making use of equation (3), a relationship between the wavelength of the plasmonic peak and the nanoparticle size can be derived. This relationship can be well approximated with a simple exponential function:

|  | (11) |
| --- | --- |

Where , and are fitted parameters whose value depends on the optical properties of the nanoparticle material: , and in the case of gold.

1. **TEM measurements and characterization**

The inspection of plasmonic nanoparticles with TEM allows determining the real size of the GNPs and comparing it with the nominal value specified by the manufacturer.

Nanoparticles have been characterized by using a high-voltage transmission electron microscope (*JEOL JEM1010*). The electron beam voltage has been set to 100kV for all the measurements, and in order to ensure images with high resolution, the magnification has been set to 300kX. For each nanoparticle lot, at least 500 individual nanoparticles have been characterized, ensuring a good statistical distribution of nanoparticle sizes and shapes.

In order to measure the nanoparticle diameter, a custom software has been developed that consists in detecting spherical objects with an algorithm based on the circular Hough Transform7. This method allows evaluating the nanoparticle diameter with an uncertainty lower than 1%.

The histogram distributions of the diameters of each nanoparticle lot are shown in Figure S2. As summarized in Table S1, TEM analysis confirms that the real size of each GNPs lot is in very good agreement with the nominal value specified by the manufacturer, the mean discrepancy between the real size and the nominal one being below 3.5 %.


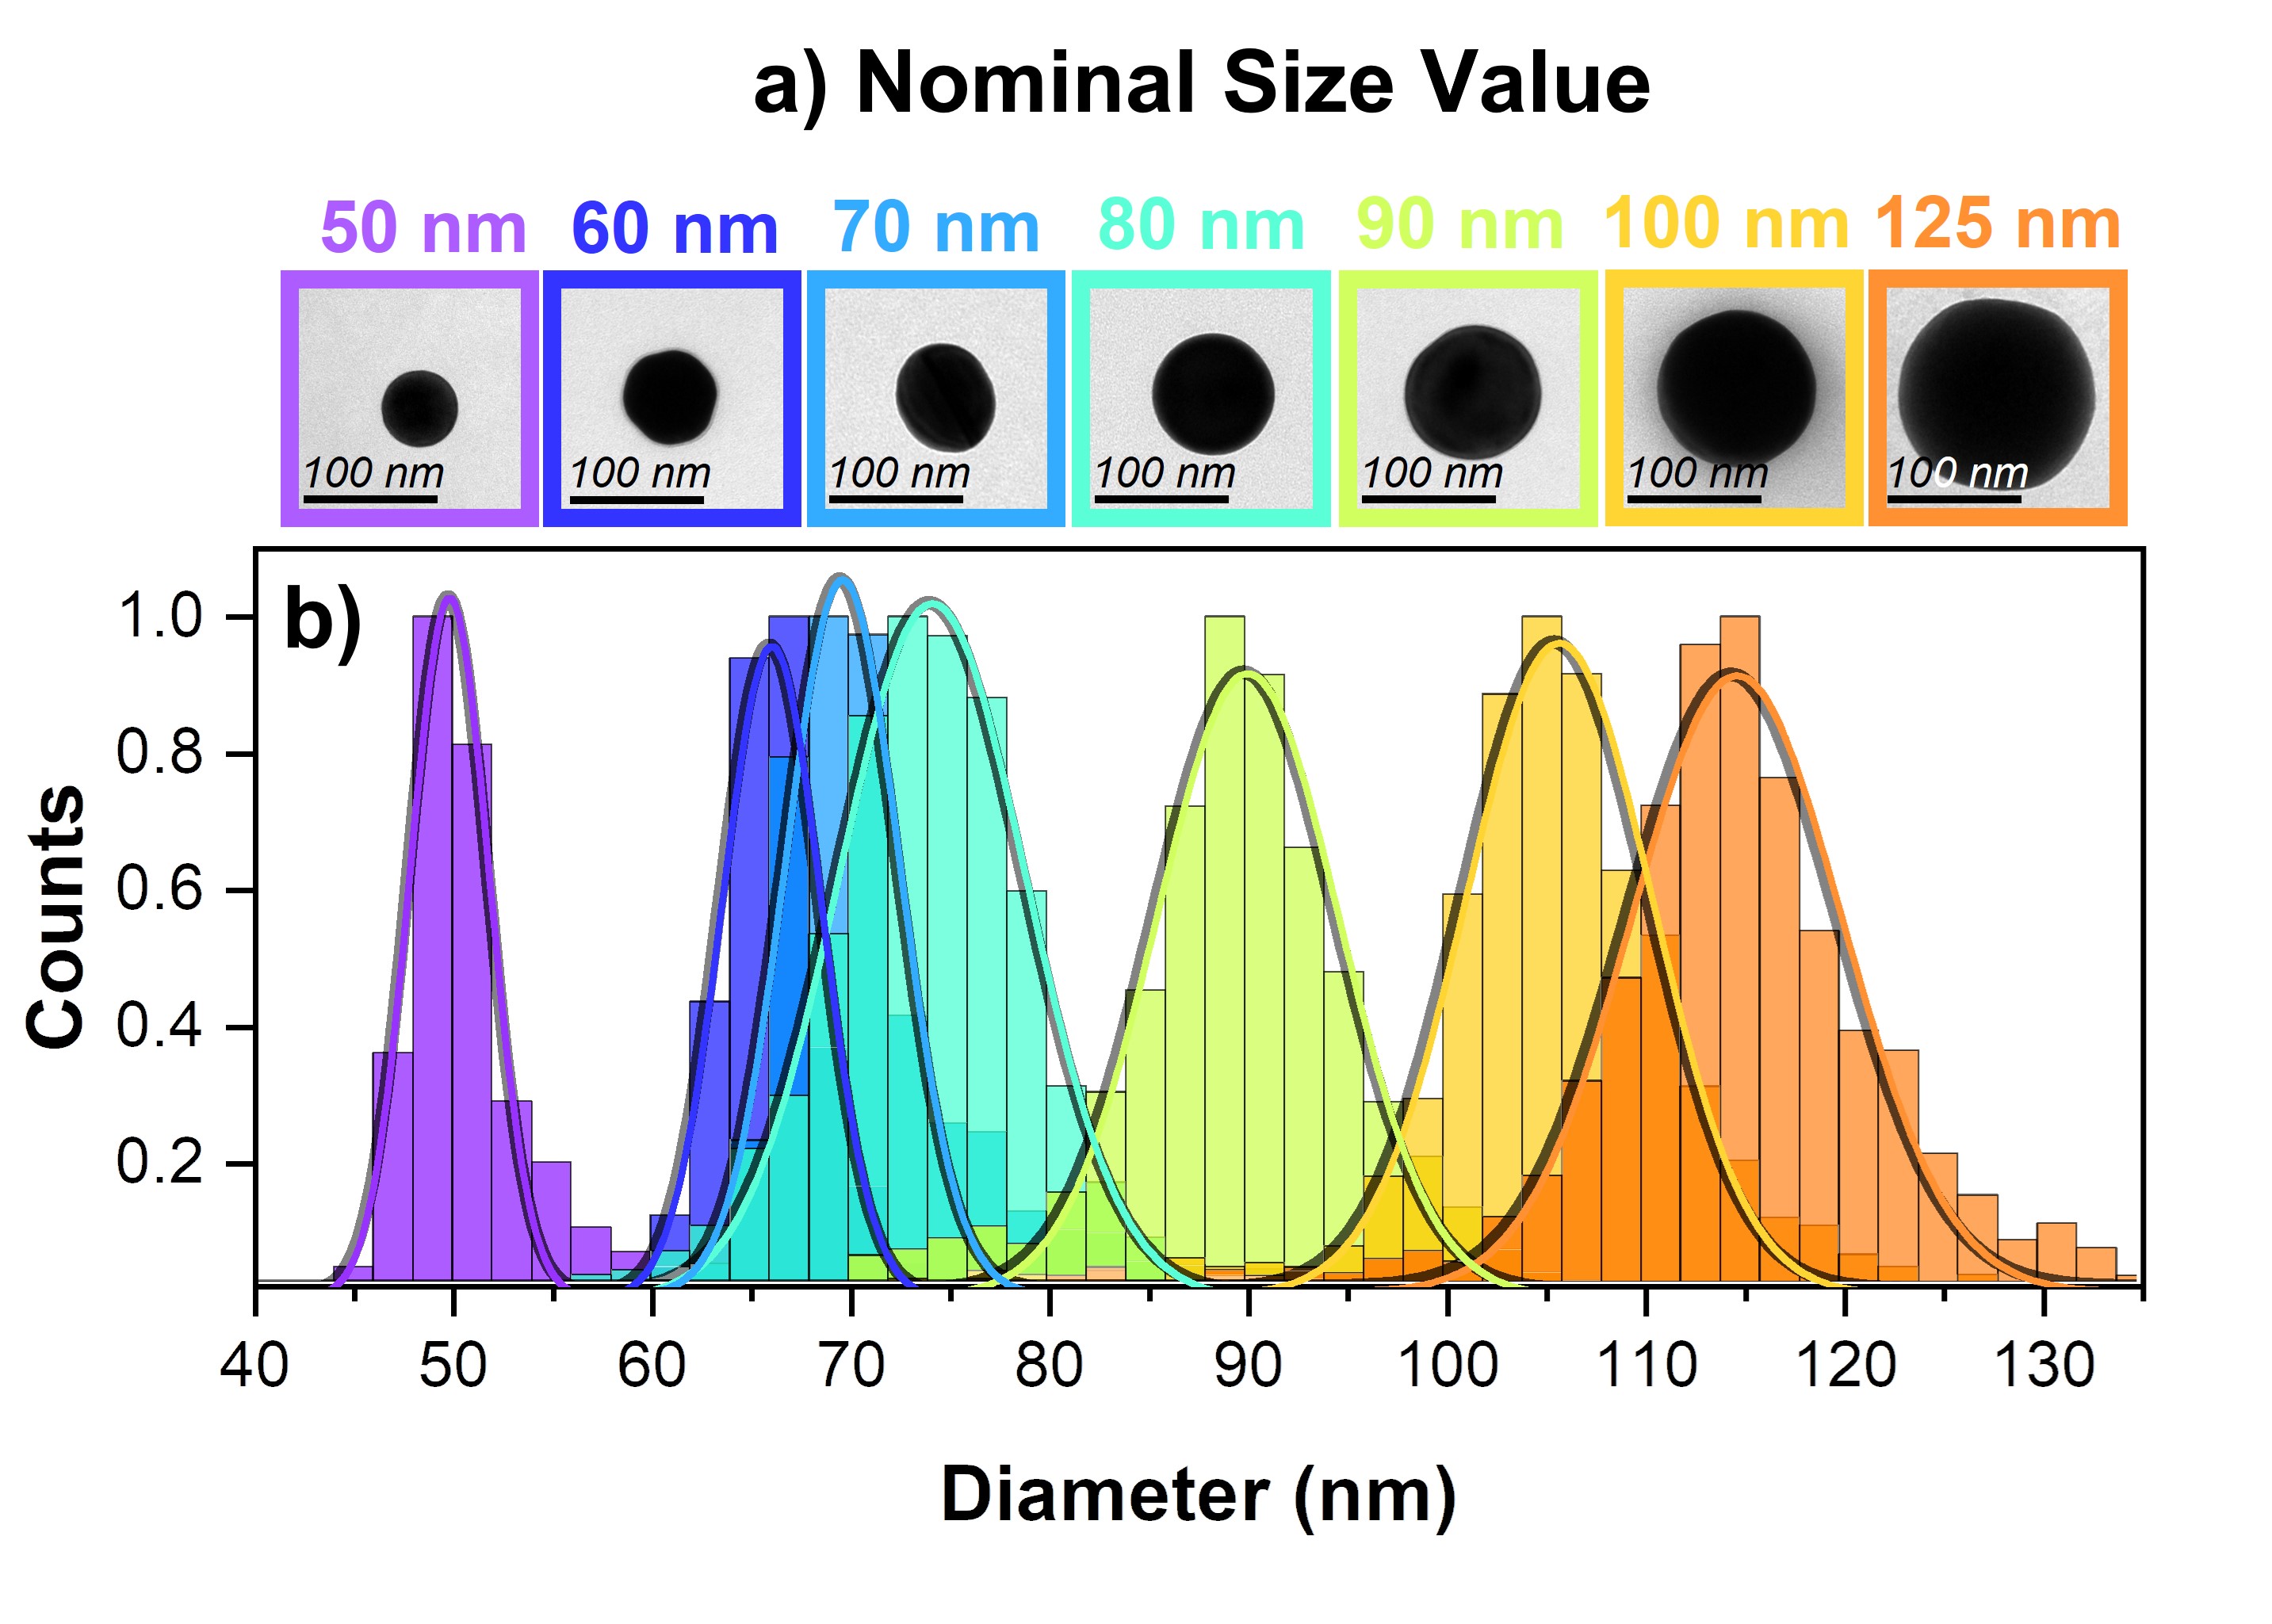


**Figure S2**: (a) Single nanoparticle TEM images of GNPs with different sizes; GNP diameters vary from 50 nm to 125 nm. As confirmed by the captured TEM images, all the nanoparticle lots studied present a very good roundness, about a 92%. (b) Histograms of the diameters of each nanoparticle lot; as outlined by the solid line for each nanoparticle lot, nanoparticles follow a Gaussian distribution with a standard deviation that is in good agreement with the nominal value given by the manufacturer.

|  | **TEM Size (nm)** | **Standard Dev. (nm)** |
| --- | --- | --- |
| **50 nm** | 49.7 | 0.6 |
| **60 nm** | 57.8 | 3.7 |
| **70 nm** | 69.5 | 0.7 |
| **80 nm** | 74.1 | 7.4 |
| **90 m** | 89.9 | 0.1 |
| **100 nm** | 103.3 | 3.3 |
| **125 nm** | 114.5 | 8.4 |

**Table S1**: TEM estimation of GNPs diameter obtained with CHT

1. **Size Comparation between TEM and DF-SPS**

Table S2 gives the size values obtained for each batch of GNPs. The average difference between TEM and DF-SPS is 3 nm, a discrepancy of less than 3%.

|  | **TEM Size (nm)** | **DF-SPS Size (nm)** | **Discrepancy (nm)** | **Discrepancy (%)** |
| --- | --- | --- | --- | --- |
| **50 nm** | 49.7 | 49.5 | 0.2 | 0.4 |
| **60 nm** | 57.8 | 57.9 | -0.1 | 0.2 |
| **70 nm** | 69.5 | 68.2 | 1.3 | 1.9 |
| **80 nm** | 74.1 | 81.9 | -7.8 | 10 |
| **90 m** | 89.9 | 93.8 | -3.9 | 4.3 |
| **100 nm** | 103.3 | 101.6 | 1.7 | 1.6 |
| **125 nm** | 114.5 | 117.9 | -3.4 | 2.9 |

**Table S2**: Comparison between the particle diameters obtained with TEM and the ones obtained with DF-SPS

**References**

1. Rafael C. Gonzalez, Richard E. Woods & Steven L. Eddins. *Digital Image Processing Using MATLAB, 3rd edition*. (Gatesmark Publishing).

2. Bohren, C. F. & Huffman, D. R. *Absorption and Scattering of Light by Small Particles*. (Wiley, 1998). doi:10.1002/9783527618156.

3. Haiss, W., Thanh, N. T. K., Aveyard, J. & Fernig, D. G. Determination of size and concentration of gold nanoparticles from UV-Vis spectra. *Analytical Chemistry* **79**, 4215–4221 (2007).

4. Matzler, C. MATLAB functions for Mie scattering and absorption. *IAP Res Rep* **8**, (2002).

5. Kreibig, U. & Fragstein, C. v. The limitation of electron mean free path in small silver particles. *Zeitschrift für Physik* **224**, 307–323 (1969).

6. Johnson, P. B. & Christy, R. W. Optical Constants of the Noble Metals. *Physical Review B* **6**, 4370–4379 (1972).

7. Yuen, H. K., Princen, J., Dlingworth, J. & Kittler, J. A Comparative Study of Hough Transform Methods for Circle Finding. in *Procedings of the Alvey Vision Conference 1989* 29.1-29.6 (Alvey Vision Club, 1989). doi:10.5244/C.3.29.
